# Supplementary material
Source: publisher figshare collection journal article supplement (https://geolsoc.figshare.com/articles/dataset/_/3453698)
Supplement: Supplementary file 1 [file 5423747]

# Ganderia-Laurentia collision in the Caledonides of Great Britain and Ireland.

John W.F. Waldron, David I Schofield, Andy Dufrane, James Floyd, Quentin G. Crowley, Tony Simonetti, Hayley Pothier, Robert Dokken.

## ***Analytical procedures and results: U-Pb detrital zircon geochronology***

Detrital zircons were analysed at the University of Alberta Radiogenic Isotope facility. Samples were crushed and zircons were separated and concentrated by standard techniques using a Wilfley table, heavy liquids and magnetic separator. The grains were ablated using a New Wave Research UP213 Nd:YAG with aperture imaging system. The wavelength was 213 nm, with a fluence of  $3 \text{ J cm}^{-2}$ , a 4 Hz pulse rate and a spot size of 40  $\mu\text{m}$ . Ablated ions were analysed with a NuPlasma multicollector ICP-MS with plasma power, gas flows, detector configuration and isotope measurements as described by Simonetti et al. (2005). Results from each sample site were recorded in 30 one-second integrations after a settling time of 3 s. Blanks and standards were recorded for the same duration as unknowns.

For the Southern Uplands samples, analysed first, separated zircons were picked, avoiding cracked or altered grains, and ~200 grains were mounted in an epoxy mount and polished to a depth required to approximately expose grain centres. Ablation points were selected using a combination of electron backscatter images, reflected, and transmitted light, so as to avoid obvious inclusions, discontinuities and cracks. Grains were analysed in sequences of 10 or 12, preceded and followed by at least two analyses of standards. Results were normalized using the in-house standard LH94-15 with isotopic ratios determined by thermal ionization mass-spectrometry (TIMS) as quoted by Simonetti et al. (2005), yielding a concordant age of 1830 Ma.

A variant of this procedure was used for the peri-Gondwanan samples, containing larger proportions of Neoproterozoic and younger grains. We prepared a random group of >300 grains from the mineral separation process, using picking to remove only obvious pyrite and other non-zircon grains. We identified zircon amongst the mounted grains using microprobe imaging. This process ensured an unbiased sampling of grains, although it probably resulted in a higher proportion of discordant and reset grains, as cloudy, metamict grains were not excluded. In addition, we included a secondary in-house standard GJ1-32 with a TIMS age of 606 Ma. Younger grains, with raw  $^{207}\text{Pb}/^{206}\text{Pb}$  ratios less than or equal to 0.0658, corresponding to an age of 800 Ma, were normalized with this standard; grains with higher raw  $^{207}\text{Pb}/^{206}\text{Pb}$  ratios were normalized with LH94-15. Age uncertainties are reported at  $2\sigma$ ; the  $^{207}\text{Pb}/^{206}\text{Pb}$  age is reported for grains with  $^{207}\text{Pb}/^{206}\text{Pb}$  age older than 800 Ma; the  $^{206}\text{Pb}/^{238}\text{U}$  age is reported for younger grains.

Data reduction was carried out using the procedure of Simonetti et al. (2005) using the same decay constants and error propagation as contained therein. All errors are quoted at 2-sigma level, equivalent to ~95% confidence that the actual value lies between the stated error limits. Analysis of each sample was completed in one day. For runs where analyses of standards showed significant variations in apparent isotopic ratios during the day, grains were normalized in 2-3 groups, bracketed by the appropriate analyses of standards. Data were collected to enable  $^{204}\text{Pb}$ -correction. However, excess ion signal at atomic mass 204, described by Simonetti et al. (2005), varied during the course of the sampling runs. The  $^{204}\text{Pb}$ -correction was therefore applied only for the minority of grains where the signal at atomic mass 204 was above 500 counts per second, indicating the presence of significant amounts of actual  $^{204}\text{Pb}$ .

Simonetti, A., Heaman, L. M., Hartlaub, R. P., Creaser, R. A., MacHattie, T. G., and Böhm, C., 2005, U-Pb zircon dating by laser ablation-MC-ICP-MS using a new multiple ion counting Faraday collector array: *Journal of Analytical Atomic Spectrometry*, v. 20, p. 677-686.





AX2661A British Grid NX 23578 57529

| Isotopic ratios   |                         |                         |                                      |         |                                     |         |                                     |         |       | Apparent age summary |                                                    |                   |                                                  |                   |                                                  |                   |               |
|-------------------|-------------------------|-------------------------|--------------------------------------|---------|-------------------------------------|---------|-------------------------------------|---------|-------|----------------------|----------------------------------------------------|-------------------|--------------------------------------------------|-------------------|--------------------------------------------------|-------------------|---------------|
| sample name       | <sup>206</sup> Pb (cps) | <sup>204</sup> Pb (cps) | <sup>207</sup> Pb/ <sup>206</sup> Pb | 2 σ     | <sup>207</sup> Pb/ <sup>235</sup> U | 2 σ     | <sup>206</sup> Pb/ <sup>238</sup> U | 2 σ     | ρ     | Com Pb corrected?    | age (Ma)<br><sup>207</sup> Pb*/ <sup>206</sup> Pb* | error (Ma)<br>2 σ | age (Ma)<br><sup>207</sup> Pb*/ <sup>235</sup> U | error (Ma)<br>2 σ | age (Ma)<br><sup>206</sup> Pb*/ <sup>238</sup> U | error (Ma)<br>2 σ | discordance % |
| AX 2661 -117 40um | 41516                   | 99                      | 0.07724                              | 0.00091 | 1.82093                             | 0.09525 | 0.17098                             | 0.00871 | 0.974 | no                   | 1127                                               | 23                | 1053                                             | 34                | 1017                                             | 48                | 10.5          |
| AX 2661 -119 40um | 60559                   | 113                     | 0.05796                              | 0.00071 | 0.58372                             | 0.02977 | 0.07304                             | 0.00361 | 0.970 | no                   | 528                                                | 27                | 467                                              | 19                | 454                                              | 22                | 14.5          |
| AX 2661 -120 40um | 22851                   | 135                     | 0.08018                              | 0.00158 | 1.79439                             | 0.09614 | 0.16231                             | 0.00808 | 0.930 | no                   | 1201                                               | 38                | 1043                                             | 34                | 970                                              | 45                | 20.8          |
| AX 2661 -121 40um | 35532                   | 154                     | 0.08644                              | 0.00191 | 1.85403                             | 0.10127 | 0.15557                             | 0.00777 | 0.914 | no                   | 1348                                               | 42                | 1065                                             | 35                | 932                                              | 43                | 33.1          |
| AX 2661 -123 40um | 40069                   | 129                     | 0.07637                              | 0.00119 | 1.65801                             | 0.08587 | 0.15746                             | 0.00778 | 0.954 | no                   | 1105                                               | 31                | 993                                              | 32                | 943                                              | 43                | 15.8          |
| AX 2661 -126 40um | 81558                   | 158                     | 0.07879                              | 0.00103 | 1.83330                             | 0.09411 | 0.16876                             | 0.00838 | 0.967 | no                   | 1167                                               | 26                | 1057                                             | 33                | 1005                                             | 46                | 15.0          |
| AX 2661 -127 40um | 80800                   | 139                     | 0.05900                              | 0.00074 | 0.59029                             | 0.03035 | 0.07256                             | 0.00362 | 0.970 | no                   | 567                                                | 27                | 471                                              | 19                | 452                                              | 22                | 21.1          |

**Results from repeat analyses of standards**

\*Values marked as outliers were excluded in the calculation of calibration values

| Analysis         | Outlier | <sup>207</sup> Pb/ <sup>206</sup> Pb | 1 se     | <sup>206</sup> Pb/ <sup>238</sup> U | 1 se     |
|------------------|---------|--------------------------------------|----------|-------------------------------------|----------|
| LH94-15 -1 40um  |         | 0.111855                             | 0.000094 | 0.368532                            | 0.001992 |
| LH94-15 -2 40um  |         | 0.112084                             | 0.000083 | 0.356584                            | 0.002136 |
| LH94-15 -3 40um  |         | 0.111852                             | 0.000126 | 0.352587                            | 0.002318 |
| LH94-15 -4 40um  |         | 0.111920                             | 0.000118 | 0.350571                            | 0.002522 |
| LH94-15 -5 40um  |         | 0.112335                             | 0.000114 | 0.338181                            | 0.001951 |
| LH94-15 -6 40um  |         | 0.111897                             | 0.000075 | 0.339800                            | 0.002559 |
| LH94-15 -7 40um  |         | 0.112130                             | 0.000087 | 0.334634                            | 0.002129 |
| LH94-15 -8 40um  |         | 0.111898                             | 0.000089 | 0.334024                            | 0.001660 |
| LH94-15 -9 40um  |         | 0.112381                             | 0.000132 | 0.340182                            | 0.002779 |
| LH94-15 -10 40um |         | 0.112183                             | 0.000115 | 0.337406                            | 0.002446 |
| LH94-15 -11 40um |         | 0.112172                             | 0.000090 | 0.335009                            | 0.002621 |
| LH94-15 -12 40um |         | 0.112063                             | 0.000083 | 0.333932                            | 0.002442 |
| LH94-15 -13 40um |         | 0.112091                             | 0.000111 | 0.327226                            | 0.001684 |
| LH94-15 -14 40um |         | 0.112511                             | 0.000111 | 0.336128                            | 0.002562 |
| LH94-15 -15 40um |         | 0.112243                             | 0.000099 | 0.336385                            | 0.002235 |
| LH94-15 -16 40um |         | 0.113005                             | 0.000132 | 0.329235                            | 0.002182 |
| LH94-15 -17 40um |         | 0.112769                             | 0.000119 | 0.332482                            | 0.002470 |
| LH94-15 -18 40um |         | 0.112332                             | 0.000099 | 0.331767                            | 0.002495 |
| LH94-15 -19 40um |         | 0.112675                             | 0.000108 | 0.326933                            | 0.002138 |
| LH94-15-20 40um  |         | 0.113155                             | 0.000115 | 0.324034                            | 0.002447 |
| LH94-15-21 40um  |         | 0.112855                             | 0.000145 | 0.322391                            | 0.002323 |
| LH94-15 -22 40um |         | 0.112789                             | 0.000108 | 0.322914                            | 0.002242 |
| LH94-15 -23 40um |         | 0.113475                             | 0.000137 | 0.327687                            | 0.003098 |
| LH94-15 -24 40um |         | 0.113096                             | 0.000169 | 0.324819                            | 0.002271 |
| LH94-15 -25 40um |         | 0.113296                             | 0.000141 | 0.322904                            | 0.002552 |
| LH94-15 -26 40um |         | 0.112579                             | 0.000114 | 0.330116                            | 0.001797 |
| LH94-15 -27 40um |         | 0.112413                             | 0.000104 | 0.322444                            | 0.002216 |
| LH94-15 -28 40um |         | 0.112572                             | 0.000104 | 0.320374                            | 0.002101 |
| LH94-15 -29 40um |         | 0.112311                             | 0.000084 | 0.324303                            | 0.002110 |
| LH94-15 -30 40um |         | 0.112444                             | 0.000062 | 0.328168                            | 0.001959 |
| LH94-15 -31 40um |         | 0.112719                             | 0.000130 | 0.323519                            | 0.001748 |



FN033 British Grid NX 5856 4868

| Isotopic ratios                        |                         |                         |                                      |         |                                     |         |                                     |         |       | Apparent age summary |                                                    |                   |                                                  |                   |                                                  |                   |               |
|----------------------------------------|-------------------------|-------------------------|--------------------------------------|---------|-------------------------------------|---------|-------------------------------------|---------|-------|----------------------|----------------------------------------------------|-------------------|--------------------------------------------------|-------------------|--------------------------------------------------|-------------------|---------------|
| sample name                            | <sup>206</sup> Pb (cps) | <sup>204</sup> Pb (cps) | <sup>207</sup> Pb/ <sup>206</sup> Pb | 2 σ     | <sup>207</sup> Pb/ <sup>235</sup> U | 2 σ     | <sup>206</sup> Pb/ <sup>238</sup> U | 2 σ     | ρ     | Com Pb corrected?    | age (Ma)<br><sup>207</sup> Pb*/ <sup>206</sup> Pb* | error (Ma)<br>2 σ | age (Ma)<br><sup>207</sup> Pb*/ <sup>235</sup> U | error (Ma)<br>2 σ | age (Ma)<br><sup>206</sup> Pb*/ <sup>238</sup> U | error (Ma)<br>2 σ | discordance % |
| <b>Discordance &gt;10% or &lt;-10%</b> |                         |                         |                                      |         |                                     |         |                                     |         |       |                      |                                                    |                   |                                                  |                   |                                                  |                   |               |
| FN033-1 40um                           | 152138                  | 82                      | 0.05670                              | 0.00075 | 0.53214                             | 0.01981 | 0.06807                             | 0.00237 | 0.934 | no                   | 480                                                | 29                | 433                                              | 13                | 425                                              | 14                | 11.9          |
| FN033-2 40um                           | 238514                  | 289                     | 0.05976                              | 0.00119 | 0.56614                             | 0.02396 | 0.06871                             | 0.00257 | 0.883 | no                   | 595                                                | 42                | 456                                              | 15                | 428                                              | 15                | 28.9          |
| FN033-4 40um                           | 58084                   | 131                     | 0.06625                              | 0.00201 | 0.75640                             | 0.03536 | 0.08280                             | 0.00294 | 0.760 | no                   | 814                                                | 62                | 572                                              | 20                | 513                                              | 17                | 38.5          |
| FN033-14 40um                          | 60745                   | 78                      | 0.05839                              | 0.00140 | 0.55702                             | 0.02438 | 0.06919                             | 0.00254 | 0.837 | no                   | 544                                                | 51                | 450                                              | 16                | 431                                              | 15                | 21.5          |
| FN033-18 40um                          | 32189                   | 60                      | 0.07205                              | 0.00123 | 1.82150                             | 0.07203 | 0.18336                             | 0.00654 | 0.902 | no                   | 987                                                | 34                | 1053                                             | 26                | 1085                                             | 36                | -10.8         |
| FN033-19 40um                          | 23218                   | 71                      | 0.07867                              | 0.00274 | 1.78322                             | 0.09005 | 0.16439                             | 0.00602 | 0.725 | no                   | 1164                                               | 67                | 1039                                             | 32                | 981                                              | 33                | 16.9          |
| FN033-20 40um                          | 172251                  | 77                      | 0.05734                              | 0.00089 | 0.57686                             | 0.02452 | 0.07296                             | 0.00289 | 0.931 | no                   | 505                                                | 34                | 462                                              | 16                | 454                                              | 17                | 10.4          |
| FN033-23 40um                          | 23939                   | 54                      | 0.07027                              | 0.00130 | 1.76123                             | 0.07066 | 0.18179                             | 0.00648 | 0.888 | no                   | 936                                                | 37                | 1031                                             | 26                | 1077                                             | 35                | -16.3         |
| FN033-28 40um                          | 210686                  | 157                     | 0.06088                              | 0.00117 | 0.52064                             | 0.02649 | 0.06203                             | 0.00292 | 0.926 | no                   | 635                                                | 41                | 426                                              | 18                | 388                                              | 18                | 40.1          |
| FN033-37 40um                          | 337116                  | 14                      | 0.10380                              | 0.00109 | 3.17534                             | 0.11406 | 0.22187                             | 0.00762 | 0.957 | no                   | 1693                                               | 19                | 1451                                             | 27                | 1292                                             | 40                | 26.1          |
| FN033-38 40um                          | 113490                  | 23                      | 0.16217                              | 0.00215 | 8.51498                             | 0.39123 | 0.38081                             | 0.01675 | 0.957 | no                   | 2478                                               | 22                | 2288                                             | 41                | 2080                                             | 78                | 18.8          |
| FN033-40 40um                          | 1063154                 | 2044                    | 0.19271                              | 0.00347 | 3.54505                             | 0.16438 | 0.13342                             | 0.00570 | 0.921 | yes                  | 2765                                               | 29                | 1537                                             | 36                | 807                                              | 32                | 75.1          |
| FN033-41 40um                          | 168552                  | 23                      | 0.09170                              | 0.00100 | 2.79310                             | 0.10033 | 0.22091                             | 0.00756 | 0.953 | no                   | 1461                                               | 21                | 1354                                             | 27                | 1287                                             | 40                | 13.2          |
| FN033-47 40um                          | 204311                  | 77                      | 0.07494                              | 0.00143 | 1.66268                             | 0.06656 | 0.16092                             | 0.00567 | 0.880 | no                   | 1067                                               | 38                | 994                                              | 25                | 962                                              | 31                | 10.6          |
| FN033-51 40um                          | 379169                  | 35                      | 0.08784                              | 0.00105 | 2.08366                             | 0.07092 | 0.17204                             | 0.00549 | 0.937 | no                   | 1379                                               | 23                | 1143                                             | 23                | 1023                                             | 30                | 27.9          |
| FN033-52 40um                          | 185515                  | 66                      | 0.07622                              | 0.00114 | 1.65995                             | 0.06232 | 0.15796                             | 0.00544 | 0.917 | no                   | 1101                                               | 30                | 993                                              | 24                | 945                                              | 30                | 15.2          |
| FN033-57 40um                          | 48167                   | 43                      | 0.05902                              | 0.00129 | 0.61559                             | 0.02644 | 0.07564                             | 0.00280 | 0.861 | no                   | 568                                                | 47                | 487                                              | 16                | 470                                              | 17                | 17.9          |
| FN033-58 40um                          | 454297                  | 257                     | 0.06198                              | 0.00162 | 0.61291                             | 0.03038 | 0.07172                             | 0.00302 | 0.849 | no                   | 674                                                | 55                | 485                                              | 19                | 446                                              | 18                | 34.9          |
| FN033-61 40um                          | 353606                  | 126                     | 0.05842                              | 0.00110 | 0.55177                             | 0.02588 | 0.06850                             | 0.00294 | 0.915 | no                   | 545                                                | 41                | 446                                              | 17                | 427                                              | 18                | 22.4          |
| FN033-74 40um                          | 132821                  | 213                     | 0.08028                              | 0.00239 | 1.92648                             | 0.08987 | 0.17404                             | 0.00625 | 0.769 | no                   | 1204                                               | 58                | 1090                                             | 31                | 1034                                             | 34                | 15.2          |

**Results from repeat analyses of standards**

\*Values marked as outliers were excluded in the calculation of calibration values

| Analysis        | Outlier | <sup>207</sup> Pb/ <sup>206</sup> Pb | 1 se     | <sup>206</sup> Pb/ <sup>238</sup> U | 1 se     |
|-----------------|---------|--------------------------------------|----------|-------------------------------------|----------|
| LH94-15-19 40um | *       | 0.115062                             | 0.000158 | 0.307886                            | 0.002507 |
| LH94-15-20 40um |         | 0.114325                             | 0.000146 | 0.308400                            | 0.002538 |
| LH94-15-21 40um |         | 0.114174                             | 0.000144 | 0.304607                            | 0.002169 |
| LH94-15-22 40um |         | 0.114043                             | 0.000149 | 0.299835                            | 0.001918 |
| LH94-15-23 40um |         | 0.114074                             | 0.000094 | 0.303292                            | 0.001915 |
| LH94-15-24 40um |         | 0.113939                             | 0.000097 | 0.302587                            | 0.001722 |
| LH94-15-25 40um |         | 0.114334                             | 0.000152 | 0.304271                            | 0.002294 |
| LH94-15-26 40um |         | 0.114532                             | 0.000131 | 0.307327                            | 0.001778 |
| LH94-15-27 40um |         | 0.114089                             | 0.000110 | 0.299595                            | 0.002033 |
| LH94-15-28 40um |         | 0.113549                             | 0.000134 | 0.304352                            | 0.002300 |
| LH94-15-29 40um |         | 0.114237                             | 0.000189 | 0.302004                            | 0.002256 |
| LH94-15-30 40um |         | 0.114912                             | 0.000157 | 0.303859                            | 0.001774 |
| LH94-15-31 40um |         | 0.114722                             | 0.000144 | 0.303918                            | 0.002013 |
| LH94-15-32 40um |         | 0.114586                             | 0.000149 | 0.304485                            | 0.002314 |
| LH94-15-33 40um |         | 0.114536                             | 0.000143 | 0.302070                            | 0.002019 |
| LH94-15-34 40um |         | 0.114669                             | 0.000153 | 0.304658                            | 0.001724 |





















LS004A British Grid NX 6843 4379

Isotopic ratios

Apparent age summary

| sample name    | <sup>206</sup> Pb (cps) | <sup>204</sup> Pb (cps) | <sup>207</sup> Pb/ <sup>206</sup> Pb | 2 σ     | <sup>207</sup> Pb/ <sup>235</sup> U | 2 σ     | <sup>206</sup> Pb/ <sup>238</sup> U | 2 σ     | ρ     | Com Pb corrected? | age (Ma)                               | error (Ma) | age (Ma)                             | error (Ma) | age (Ma)                             | error (Ma) | discordance % |
|----------------|-------------------------|-------------------------|--------------------------------------|---------|-------------------------------------|---------|-------------------------------------|---------|-------|-------------------|----------------------------------------|------------|--------------------------------------|------------|--------------------------------------|------------|---------------|
|                |                         |                         |                                      |         |                                     |         |                                     |         |       |                   | <sup>207</sup> Pb*/ <sup>206</sup> Pb* | 2 σ        | <sup>207</sup> Pb*/ <sup>235</sup> U | 2 σ        | <sup>206</sup> Pb*/ <sup>238</sup> U | 2 σ        |               |
| LS004A-22 40um | 314419                  | 1492                    | 0.14792                              | 0.00691 | 4.83753                             | 0.33476 | 0.23718                             | 0.01211 | 0.738 | no                | 2322                                   | 78         | 1791                                 | 57         | 1372                                 | 63         | 45.3          |
| LS004A-23 40um | 33284                   | 46                      | 0.05752                              | 0.00117 | 0.57412                             | 0.03577 | 0.07239                             | 0.00426 | 0.945 | no                | 512                                    | 44         | 461                                  | 23         | 451                                  | 26         | 12.4          |
| LS004A-27 40um | 171694                  | 56                      | 0.05691                              | 0.00071 | 0.52551                             | 0.02525 | 0.06697                             | 0.00311 | 0.966 | no                | 488                                    | 27         | 429                                  | 17         | 418                                  | 19         | 14.9          |
| LS004A-29 40um | 160381                  | 55                      | 0.05722                              | 0.00072 | 0.53178                             | 0.02723 | 0.06740                             | 0.00334 | 0.969 | no                | 500                                    | 28         | 433                                  | 18         | 421                                  | 20         | 16.4          |
| LS004A-30 40um | 332433                  | 76                      | 0.07225                              | 0.00080 | 1.42733                             | 0.07607 | 0.14328                             | 0.00747 | 0.978 | no                | 993                                    | 22         | 900                                  | 31         | 863                                  | 42         | 14.0          |
| LS004A-31 40um | 52524                   | 47                      | 0.07999                              | 0.00197 | 1.99872                             | 0.10939 | 0.18123                             | 0.00886 | 0.893 | no                | 1197                                   | 48         | 1115                                 | 36         | 1074                                 | 48         | 11.2          |
| LS004A-34 40um | 348726                  | 128                     | 0.19152                              | 0.00204 | 12.24043                            | 0.74234 | 0.46353                             | 0.02767 | 0.984 | no                | 2755                                   | 17         | 2623                                 | 55         | 2455                                 | 121        | 13.1          |
| LS004A-36 40um | 421039                  | 209                     | 0.09952                              | 0.00110 | 3.35153                             | 0.18177 | 0.24424                             | 0.01297 | 0.979 | no                | 1615                                   | 20         | 1493                                 | 42         | 1409                                 | 67         | 14.2          |
| LS004A-39 40um | 664368                  | 354                     | 0.19608                              | 0.00210 | 11.94929                            | 0.57048 | 0.44198                             | 0.02056 | 0.974 | no                | 2794                                   | 17         | 2600                                 | 44         | 2359                                 | 91         | 18.5          |
| LS004A-40 40um | 661348                  | 210                     | 0.10131                              | 0.00120 | 3.62459                             | 0.19108 | 0.25949                             | 0.01333 | 0.974 | no                | 1648                                   | 22         | 1555                                 | 41         | 1487                                 | 68         | 10.9          |
| LS004A-41 40um | 471007                  | 73                      | 0.11698                              | 0.00118 | 4.93593                             | 0.29651 | 0.30601                             | 0.01812 | 0.986 | no                | 1911                                   | 18         | 1808                                 | 49         | 1721                                 | 89         | 11.3          |
| LS004A-50 40um | 603411                  | 212                     | 0.07603                              | 0.00097 | 1.63045                             | 0.08223 | 0.15553                             | 0.00759 | 0.968 | no                | 1096                                   | 25         | 982                                  | 31         | 932                                  | 42         | 16.1          |
| LS004A-51 40um | 417869                  | 215                     | 0.11420                              | 0.00136 | 3.39168                             | 0.18950 | 0.21540                             | 0.01176 | 0.977 | no                | 1867                                   | 21         | 1502                                 | 43         | 1258                                 | 62         | 35.9          |
| LS004A-53 40um | 75284                   | 74                      | 0.06302                              | 0.00156 | 0.63079                             | 0.03856 | 0.07260                             | 0.00405 | 0.914 | no                | 709                                    | 52         | 497                                  | 24         | 452                                  | 24         | 37.5          |
| LS004A-54 40um | 29696                   | 62                      | 0.06115                              | 0.00115 | 0.59721                             | 0.03284 | 0.07083                             | 0.00366 | 0.940 | no                | 645                                    | 40         | 475                                  | 21         | 441                                  | 22         | 32.7          |
| LS004A-59 40um | 15856                   | 54                      | 0.06034                              | 0.00131 | 0.58441                             | 0.03165 | 0.07024                             | 0.00349 | 0.916 | no                | 616                                    | 46         | 467                                  | 20         | 438                                  | 21         | 29.9          |
| LS004A-61 40um | 217408                  | 467                     | 0.08332                              | 0.00275 | 0.82890                             | 0.04029 | 0.07215                             | 0.00257 | 0.734 | no                | 1277                                   | 63         | 613                                  | 22         | 449                                  | 15         | 67.1          |
| LS004A-66 40um | 632773                  | 1733                    | 0.12613                              | 0.00506 | 4.57658                             | 0.24741 | 0.26317                             | 0.00954 | 0.671 | no                | 2045                                   | 69         | 1745                                 | 44         | 1506                                 | 49         | 29.5          |
| LS004A-69 40um | 33087                   | 84                      | 0.05676                              | 0.00096 | 0.54596                             | 0.02273 | 0.06976                             | 0.00265 | 0.914 | no                | 482                                    | 37         | 442                                  | 15         | 435                                  | 16         | 10.2          |
| LS004A-76 40um | 93884                   | 123                     | 0.05888                              | 0.00079 | 0.64445                             | 0.02849 | 0.07938                             | 0.00334 | 0.953 | no                | 563                                    | 29         | 505                                  | 17         | 492                                  | 20         | 13.0          |
| LS004A-80 40um | 339857                  | 472                     | 0.10308                              | 0.00156 | 3.62222                             | 0.17385 | 0.25485                             | 0.01161 | 0.949 | no                | 1680                                   | 28         | 1554                                 | 37         | 1463                                 | 59         | 14.4          |

LS004A

Results from repeat analyses of standards

\*Values marked as outliers were excluded in the calculation of calibration values

| Analysis        | Outlier | <sup>207</sup> Pb/ <sup>206</sup> Pb | 1 se     | <sup>206</sup> Pb/ <sup>238</sup> U | 1 se     |
|-----------------|---------|--------------------------------------|----------|-------------------------------------|----------|
| LH94-15-1 40um  | *       | 0.114552                             | 0.000217 | 0.318972                            | 0.002757 |
| LH94-15-2 40um  |         | 0.113893                             | 0.000135 | 0.321445                            | 0.002547 |
| LH94-15-3 40um  |         | 0.113962                             | 0.000094 | 0.318953                            | 0.002592 |
| LH94-15-4 40um  |         | 0.113720                             | 0.000114 | 0.319271                            | 0.001395 |
| LH94-15-5 40um  |         | 0.113526                             | 0.000126 | 0.310573                            | 0.002279 |
| LH94-15-6 40um  |         | 0.113487                             | 0.000164 | 0.312201                            | 0.002005 |
| LH94-15-7 40um  |         | 0.113935                             | 0.000177 | 0.306857                            | 0.002040 |
| LH94-15-8 40um  |         | 0.114312                             | 0.000124 | 0.309054                            | 0.002872 |
| LH94-15-9 40um  |         | 0.114271                             | 0.000144 | 0.301395                            | 0.001911 |
| LH94-15-10 40um |         | 0.114140                             | 0.000127 | 0.300372                            | 0.002313 |
| LH94-15-11 40um |         | 0.114235                             | 0.000124 | 0.307127                            | 0.001806 |
| LH94-15-12 40um |         | 0.114266                             | 0.000122 | 0.312303                            | 0.002177 |
| LH94-15-13 40um |         | 0.114784                             | 0.000130 | 0.297814                            | 0.001601 |
| LH94-15-14 40um |         | 0.114857                             | 0.000183 | 0.300964                            | 0.002228 |
| LH94-15-15 40um |         | 0.114973                             | 0.000168 | 0.294133                            | 0.001522 |
| LH94-15-16 40um |         | 0.114943                             | 0.000191 | 0.294162                            | 0.001914 |
| LH94-15-17 40um |         | 0.115027                             | 0.000148 | 0.297342                            | 0.002044 |
| LH94-15-18 40um |         | 0.114390                             | 0.000149 | 0.294155                            | 0.001757 |













ML016A British Grid NY 15564 31567

| Isotopic ratios |                         |                         |                                      |         |                                     |         |                                     |         |       | Apparent age summary |                                                    |                   |                                                  |                   |                                                  |                   |                  |
|-----------------|-------------------------|-------------------------|--------------------------------------|---------|-------------------------------------|---------|-------------------------------------|---------|-------|----------------------|----------------------------------------------------|-------------------|--------------------------------------------------|-------------------|--------------------------------------------------|-------------------|------------------|
| sample name     | <sup>206</sup> Pb (cps) | <sup>204</sup> Pb (cps) | <sup>207</sup> Pb/ <sup>206</sup> Pb | 2 σ     | <sup>207</sup> Pb/ <sup>235</sup> U | 2 σ     | <sup>206</sup> Pb/ <sup>238</sup> U | 2 σ     | ρ     | Com Pb corrected?    | age (Ma)<br><sup>207</sup> Pb*/ <sup>206</sup> Pb* | error (Ma)<br>2 σ | age (Ma)<br><sup>207</sup> Pb*/ <sup>235</sup> U | error (Ma)<br>2 σ | age (Ma)<br><sup>206</sup> Pb*/ <sup>238</sup> U | error (Ma)<br>2 σ | discordance<br>% |
| ML016A-88       | 2265986                 | 179                     | 0.21860                              | 0.00222 | 15.23376                            | 0.73083 | 0.50542                             | 0.02370 | 0.977 | no                   | 2970                                               | 16                | 2830                                             | 45                | 2637                                             | 101               | 13.7             |
| ML016A-89       | 29221                   | 160                     | 0.06585                              | 0.00158 | 0.78138                             | 0.03311 | 0.08606                             | 0.00301 | 0.825 | no                   | 802                                                | 49                | 586                                              | 19                | 532                                              | 18                | 35.0             |
| ML016A-91       | 91050                   | 147                     | 0.06123                              | 0.00069 | 0.79024                             | 0.02804 | 0.09360                             | 0.00315 | 0.948 | no                   | 647                                                | 24                | 591                                              | 16                | 577                                              | 19                | 11.4             |
| ML016A-93       | 59149                   | 163                     | 0.06114                              | 0.00075 | 0.79343                             | 0.02911 | 0.09411                             | 0.00325 | 0.942 | no                   | 644                                                | 26                | 593                                              | 16                | 580                                              | 19                | 10.5             |
| ML016A-94       | 152916                  | 140                     | 0.06118                              | 0.00071 | 0.77361                             | 0.02628 | 0.09171                             | 0.00293 | 0.939 | no                   | 646                                                | 25                | 582                                              | 15                | 566                                              | 17                | 12.9             |
| ML016A-96       | 351209                  | 296                     | 0.08823                              | 0.00113 | 2.33378                             | 0.11068 | 0.19184                             | 0.00876 | 0.963 | no                   | 1388                                               | 24                | 1223                                             | 33                | 1131                                             | 47                | 20.1             |
| ML016A-99       | 809850                  | 50                      | 0.24213                              | 0.00244 | 18.59253                            | 0.93997 | 0.55692                             | 0.02759 | 0.980 | no                   | 3134                                               | 16                | 3021                                             | 48                | 2854                                             | 113               | 11.0             |
| ML016A-103      | 65194                   | 27                      | 0.05963                              | 0.00073 | 0.69231                             | 0.02315 | 0.08421                             | 0.00262 | 0.930 | no                   | 590                                                | 26                | 534                                              | 14                | 521                                              | 16                | 12.2             |
| ML016A-109      | 146841                  | 158                     | 0.06140                              | 0.00071 | 0.77697                             | 0.02829 | 0.09178                             | 0.00317 | 0.948 | no                   | 653                                                | 25                | 584                                              | 16                | 566                                              | 19                | 14.0             |
| ML016A-110      | 278709                  | 182                     | 0.06441                              | 0.00092 | 0.96500                             | 0.03498 | 0.10866                             | 0.00362 | 0.919 | no                   | 755                                                | 30                | 686                                              | 18                | 665                                              | 21                | 12.6             |
| ML016A-112      | 66880                   | 149                     | 0.05986                              | 0.00079 | 0.70844                             | 0.02491 | 0.08584                             | 0.00280 | 0.927 | no                   | 598                                                | 28                | 544                                              | 15                | 531                                              | 17                | 11.8             |
| ML016A-113      | 95950                   | 157                     | 0.06154                              | 0.00070 | 0.79944                             | 0.02688 | 0.09421                             | 0.00298 | 0.942 | no                   | 658                                                | 24                | 597                                              | 15                | 580                                              | 18                | 12.4             |
| ML016A-115      | 129144                  | 167                     | 0.08657                              | 0.00095 | 2.49581                             | 0.11420 | 0.20911                             | 0.00929 | 0.971 | no                   | 1351                                               | 21                | 1271                                             | 33                | 1224                                             | 49                | 10.3             |
| ML016A-118      | 54537                   | 193                     | 0.06347                              | 0.00135 | 0.82338                             | 0.03306 | 0.09409                             | 0.00321 | 0.849 | no                   | 724                                                | 44                | 610                                              | 18                | 580                                              | 19                | 20.8             |
| ML016A-119      | 109500                  | 160                     | 0.08232                              | 0.00092 | 2.15845                             | 0.09971 | 0.19016                             | 0.00853 | 0.970 | no                   | 1253                                               | 22                | 1168                                             | 32                | 1122                                             | 46                | 11.4             |
| ML016A-129      | 45469                   | 139                     | 0.06140                              | 0.00098 | 0.80297                             | 0.03701 | 0.09485                             | 0.00410 | 0.938 | no                   | 653                                                | 34                | 599                                              | 21                | 584                                              | 24                | 11.1             |
| ML016A-131      | 191514                  | 146                     | 0.06047                              | 0.00077 | 0.67826                             | 0.02594 | 0.08135                             | 0.00293 | 0.943 | no                   | 620                                                | 27                | 526                                              | 16                | 504                                              | 17                | 19.5             |
| ML016A-135      | 118430                  | 122                     | 0.05940                              | 0.00071 | 0.68206                             | 0.02337 | 0.08328                             | 0.00268 | 0.938 | no                   | 582                                                | 26                | 528                                              | 14                | 516                                              | 16                | 11.8             |
| ML016A-136      | 177013                  | 135                     | 0.06737                              | 0.00167 | 1.02940                             | 0.05382 | 0.11082                             | 0.00511 | 0.881 | no                   | 849                                                | 51                | 719                                              | 27                | 678                                              | 30                | 21.3             |
| ML016A-137      | 797420                  | 98                      | 0.12351                              | 0.00125 | 5.53592                             | 0.25616 | 0.32508                             | 0.01468 | 0.976 | no                   | 2008                                               | 18                | 1906                                             | 39                | 1815                                             | 71                | 11.0             |
| ML016A-138      | 43074                   | 153                     | 0.06487                              | 0.00122 | 0.81514                             | 0.03260 | 0.09114                             | 0.00322 | 0.883 | no                   | 770                                                | 39                | 605                                              | 18                | 562                                              | 19                | 28.2             |
| ML016A-140      | 67171                   | 111                     | 0.06140                              | 0.00080 | 0.78473                             | 0.02767 | 0.09270                             | 0.00304 | 0.930 | no                   | 653                                                | 28                | 588                                              | 16                | 571                                              | 18                | 13.1             |
| ML016A-141      | 79484                   | 113                     | 0.06497                              | 0.00175 | 0.84606                             | 0.03627 | 0.09445                             | 0.00315 | 0.778 | no                   | 773                                                | 56                | 622                                              | 20                | 582                                              | 19                | 25.9             |
| ML016A-142      | 210294                  | 93                      | 0.06025                              | 0.00065 | 0.74441                             | 0.02609 | 0.08961                             | 0.00299 | 0.952 | no                   | 613                                                | 23                | 565                                              | 15                | 553                                              | 18                | 10.1             |

ML016A

Results from repeat analyses of standards

\*Values marked as outliers were excluded in the calculation of calibration values

| Analysis   | Outlier | <sup>207</sup> Pb/ <sup>206</sup> Pb | 1 se     | <sup>206</sup> Pb/ <sup>238</sup> U | 1 se     |
|------------|---------|--------------------------------------|----------|-------------------------------------|----------|
| LH94-15-1  |         | 0.110653                             | 0.000108 | 0.375625                            | 0.002542 |
| LH94-15-2  |         | 0.110556                             | 0.000120 | 0.374333                            | 0.002850 |
| LH94-15-3  |         | 0.110375                             | 0.000108 | 0.370324                            | 0.003736 |
| LH94-15-4  |         | 0.110501                             | 0.000118 | 0.368203                            | 0.003416 |
| LH94-15-5  |         | 0.110652                             | 0.000135 | 0.372989                            | 0.002545 |
| LH94-15-6  | *       | 0.110787                             | 0.000121 | 0.387286                            | 0.002454 |
| LH95-15-07 |         | 0.110803                             | 0.000129 | 0.369489                            | 0.003223 |
| LH94-15-08 |         | 0.111080                             | 0.000120 | 0.362859                            | 0.002132 |
| LH94-15-9  |         | 0.111170                             | 0.000067 | 0.360187                            | 0.001795 |
| LH94-15-10 |         | 0.111203                             | 0.000097 | 0.365153                            | 0.002071 |
| LH94-15-11 |         | 0.110903                             | 0.000070 | 0.359816                            | 0.001740 |
| LH94-15-12 |         | 0.111076                             | 0.000111 | 0.359084                            | 0.001794 |
| LH94-15-13 |         | 0.111225                             | 0.000130 | 0.347452                            | 0.002154 |
| LH94-15-14 |         | 0.111112                             | 0.000078 | 0.356946                            | 0.001917 |
| LH94-15-16 |         | 0.111389                             | 0.000092 | 0.354440                            | 0.001398 |
| LH94-15-17 |         | 0.111612                             | 0.000085 | 0.351577                            | 0.003633 |
| LH94-15-18 |         | 0.111154                             | 0.000168 | 0.357987                            | 0.001901 |
| LH94-15-19 |         | 0.111555                             | 0.000134 | 0.361413                            | 0.001449 |
| LH94-15-20 |         | 0.111517                             | 0.000116 | 0.353943                            | 0.002133 |
| LH94-15-21 |         | 0.111446                             | 0.000144 | 0.357872                            | 0.001490 |
| LH94-15-22 |         | 0.110948                             | 0.000148 | 0.350210                            | 0.001445 |
| LH94-15-23 |         | 0.111153                             | 0.000117 | 0.349088                            | 0.002032 |
| LH94-15-24 |         | 0.111021                             | 0.000130 | 0.355796                            | 0.002117 |
| LH94-15-25 |         | 0.111389                             | 0.000140 | 0.353775                            | 0.001894 |
| LH94-15-26 |         | 0.111314                             | 0.000105 | 0.357624                            | 0.001588 |
| LH94-15-27 |         | 0.111699                             | 0.000135 | 0.361452                            | 0.001509 |
| LH94-15-28 |         | 0.111322                             | 0.000121 | 0.352936                            | 0.001591 |
| LH94-15-29 |         | 0.111542                             | 0.000134 | 0.357257                            | 0.001640 |
| GJ1-32-1   |         | 0.059965                             | 0.000116 | 0.107528                            | 0.001244 |
| GJ1-32-2   |         | 0.059836                             | 0.000137 | 0.107987                            | 0.001167 |















ML109A British Grid SD 7816 7103

## Isotopic ratios

## Apparent age summary

| sample name | <sup>206</sup> Pb (cps) | <sup>204</sup> Pb (cps) | <sup>207</sup> Pb/ <sup>206</sup> Pb | 2 σ | <sup>207</sup> Pb/ <sup>235</sup> U | 2 σ | <sup>206</sup> Pb/ <sup>238</sup> U | 2 σ | ρ | Com Pb corrected? | age (Ma)<br><sup>207</sup> Pb*/ <sup>206</sup> Pb* | error (Ma)<br>2 σ | age (Ma)<br><sup>207</sup> Pb*/ <sup>235</sup> U | error (Ma)<br>2 σ | age (Ma)<br><sup>206</sup> Pb*/ <sup>238</sup> U | error (Ma)<br>2 σ | discordance<br>% |
|-------------|-------------------------|-------------------------|--------------------------------------|-----|-------------------------------------|-----|-------------------------------------|-----|---|-------------------|----------------------------------------------------|-------------------|--------------------------------------------------|-------------------|--------------------------------------------------|-------------------|------------------|
|-------------|-------------------------|-------------------------|--------------------------------------|-----|-------------------------------------|-----|-------------------------------------|-----|---|-------------------|----------------------------------------------------|-------------------|--------------------------------------------------|-------------------|--------------------------------------------------|-------------------|------------------|

## Results from repeat analyses of standards

\*Values marked as outliers were excluded in the calculation of calibration values

| Analysis   | Outlier | <sup>207</sup> Pb/ <sup>206</sup> Pb | 1 se     | <sup>206</sup> Pb/ <sup>238</sup> U | 1 se     |
|------------|---------|--------------------------------------|----------|-------------------------------------|----------|
| LH9415-1   |         | 0.112935                             | 0.000170 | 0.382398                            | 0.003324 |
| LH9415-2   |         | 0.113225                             | 0.000219 | 0.399416                            | 0.005885 |
| LH9415-3   |         | 0.113136                             | 0.000225 | 0.393216                            | 0.005784 |
| LH9415-4   |         | 0.112874                             | 0.000172 | 0.384819                            | 0.005234 |
| LH9415-5   |         | 0.112651                             | 0.000223 | 0.397254                            | 0.007326 |
| LH9415-6   |         | 0.113264                             | 0.000152 | 0.372309                            | 0.006799 |
| LH9415-8   |         | 0.113528                             | 0.000219 | 0.382459                            | 0.003696 |
| LH9415-9   |         | 0.113553                             | 0.000143 | 0.387154                            | 0.003484 |
| LH9415-11  |         | 0.113637                             | 0.000150 | 0.404372                            | 0.004009 |
| LH9415-12  |         | 0.114049                             | 0.000206 | 0.381765                            | 0.006089 |
| LH9415-13  |         | 0.114442                             | 0.000199 | 0.388660                            | 0.003865 |
| LH9415-14  |         | 0.114067                             | 0.000193 | 0.375923                            | 0.006166 |
| LH9415-15  |         | 0.114376                             | 0.000147 | 0.366465                            | 0.004965 |
| LH9415-16  | *       | 0.114391                             | 0.000186 | 0.372681                            | 0.006566 |
| LH9415-17  | *       | 0.114581                             | 0.000170 | 0.378671                            | 0.005655 |
| LH9415-17A |         | 0.113542                             | 0.000205 | 0.362274                            | 0.004704 |
| LH9415-18  |         | 0.113414                             | 0.000223 | 0.370863                            | 0.006270 |
| LH9415-19  |         | 0.113393                             | 0.000157 | 0.364860                            | 0.003379 |
| LH9415-20  | *       | 0.112386                             | 0.000161 | 0.369079                            | 0.003828 |
| LH9415-21  | *       | 0.111685                             | 0.000196 | 0.350695                            | 0.006683 |
| LH9415-22  |         | 0.112679                             | 0.000215 | 0.345098                            | 0.005354 |
| LH9415-23  |         | 0.111920                             | 0.000243 | 0.343435                            | 0.004439 |
| LH9415-25  |         | 0.112444                             | 0.000245 | 0.330750                            | 0.005017 |
| LH9415-27  |         | 0.112896                             | 0.000236 | 0.338413                            | 0.007181 |
| LH9415-28  |         | 0.111916                             | 0.000182 | 0.322647                            | 0.006453 |
| LH9415-29  |         | 0.112100                             | 0.000206 | 0.342665                            | 0.003565 |
| GJ132-1    |         | 0.061244                             | 0.000196 | 0.114402                            | 0.001674 |
| GJ132-2    |         | 0.062464                             | 0.000166 | 0.115970                            | 0.000868 |
| GJ132-3    |         | 0.060850                             | 0.000148 | 0.114506                            | 0.001266 |
| GJ132-4    |         | 0.060025                             | 0.000138 | 0.112342                            | 0.002188 |
| GJ132-6    |         | 0.062317                             | 0.000399 | 0.118238                            | 0.001536 |
| GJ132-9    |         | 0.062029                             | 0.000311 | 0.123702                            | 0.001891 |
| GJ132-10   | *       | 0.061367                             | 0.000326 | 0.122920                            | 0.005509 |
| GJ132-11   |         | 0.060393                             | 0.000173 | 0.115570                            | 0.001916 |
| GJ132-12   |         | 0.061038                             | 0.000243 | 0.108175                            | 0.002255 |
| GJ132-13   |         | 0.061048                             | 0.000128 | 0.114569                            | 0.001261 |
| GJ132-14   |         | 0.061101                             | 0.000206 | 0.110322                            | 0.001257 |
| GJ132-15   |         | 0.061432                             | 0.000100 | 0.110120                            | 0.001953 |
| GJ132-17   |         | 0.060037                             | 0.000279 | 0.110722                            | 0.001836 |
| GJ132-18   |         | 0.060096                             | 0.000316 | 0.104961                            | 0.001380 |
| GJ132-19   |         | 0.059769                             | 0.000297 | 0.105854                            | 0.001176 |
| GJ132-20   | *       | 0.058109                             | 0.000320 | 0.112569                            | 0.002513 |
| GJ132-21   | *       | 0.057972                             | 0.000507 | 0.105299                            | 0.000939 |
| GJ132-22   |         | 0.058997                             | 0.000162 | 0.102988                            | 0.001354 |
| GJ132-23   |         | 0.058654                             | 0.000350 | 0.100936                            | 0.000733 |
| GJ132-25   |         | 0.058565                             | 0.000316 | 0.099584                            | 0.000880 |
| GJ132-27   |         | 0.058969                             | 0.000279 | 0.101387                            | 0.001194 |
| GJ132-28   |         | 0.058663                             | 0.000411 | 0.102623                            | 0.001467 |
| GJ132-29   |         | 0.057817                             | 0.000237 | 0.100655                            | 0.001577 |





| ML119A          |                         | Irish Grid              |                                      | IS 8715 0778 |                                     | Apparent age summary |                                     |         |       |                   |                                                    |                   |                                                  |                   |                                                  |                   |                  |  |  |  |
|-----------------|-------------------------|-------------------------|--------------------------------------|--------------|-------------------------------------|----------------------|-------------------------------------|---------|-------|-------------------|----------------------------------------------------|-------------------|--------------------------------------------------|-------------------|--------------------------------------------------|-------------------|------------------|--|--|--|
| Isotopic ratios |                         |                         |                                      |              |                                     |                      |                                     |         |       |                   |                                                    |                   |                                                  |                   |                                                  |                   |                  |  |  |  |
| sample name     | <sup>206</sup> Pb (cps) | <sup>204</sup> Pb (cps) | <sup>207</sup> Pb/ <sup>206</sup> Pb | 2 σ          | <sup>207</sup> Pb/ <sup>235</sup> U | 2 σ                  | <sup>206</sup> Pb/ <sup>238</sup> U | 2 σ     | ρ     | Com Pb corrected? | age (Ma)<br><sup>207</sup> Pb*/ <sup>206</sup> Pb* | error (Ma)<br>2 σ | age (Ma)<br><sup>207</sup> Pb*/ <sup>235</sup> U | error (Ma)<br>2 σ | age (Ma)<br><sup>206</sup> Pb*/ <sup>238</sup> U | error (Ma)<br>2 σ | discordance<br>% |  |  |  |
| ML119A-094      | 38286                   | 3                       | 0.06183                              | 0.00129      | 0.81086                             | 0.04364              | 0.09511                             | 0.00472 | 0.922 | no                | 668                                                | 44                | 603                                              | 24                | 586                                              | 28                | 12.9             |  |  |  |
| ML119A-095      | 9461                    | 4                       | 0.05660                              | 0.00455      | 0.71348                             | 0.06697              | 0.09143                             | 0.00442 | 0.515 | no                | 476                                                | 169               | 547                                              | 39                | 564                                              | 26                | -19.4            |  |  |  |
| ML119A-096      | 160482                  | 2                       | 0.14284                              | 0.00261      | 6.53695                             | 0.46420              | 0.33191                             | 0.02278 | 0.966 | no                | 2262                                               | 31                | 2051                                             | 61                | 1848                                             | 109               | 21.0             |  |  |  |
| ML119A-097      | 7663                    | 0                       | 0.05336                              |              | 0.74401                             | 0.04791              | 0.10113                             | 0.00483 | 0.742 | no                | 344                                                | 95                | 565                                              | 28                | 621                                              | 28                | -84.5            |  |  |  |
| ML119A-110      | 11347                   | 23                      | 0.05635                              | 0.00133      | 0.72903                             | 0.04496              | 0.09383                             | 0.00535 | 0.924 | no                | 466                                                | 51                | 556                                              | 26                | 578                                              | 31                | -25.1            |  |  |  |
| ML119A-116      | 58461                   | 7                       | 0.05936                              | 0.00091      | 0.68084                             | 0.03753              | 0.08319                             | 0.00441 | 0.961 | no                | 580                                                | 33                | 527                                              | 22                | 515                                              | 26                | 11.7             |  |  |  |
| ML119A-119      | 4990                    | 14                      | 0.04978                              | 0.00248      | 0.64950                             | 0.04395              | 0.09462                             | 0.00433 | 0.677 | no                | 185                                                | 112               | 508                                              | 27                | 583                                              | 25                | -225.1           |  |  |  |
| ML119A-122      | 78543                   | 11                      | 0.09491                              | 0.00104      | 3.02644                             | 0.18435              | 0.23128                             | 0.01386 | 0.984 | no                | 1526                                               | 21                | 1414                                             | 45                | 1341                                             | 72                | 13.4             |  |  |  |
| ML119A-124      | 18695                   | 24                      | 0.07293                              | 0.00139      | 0.73437                             | 0.04677              | 0.07303                             | 0.00444 | 0.954 | no                | 1012                                               | 38                | 559                                              | 27                | 454                                              | 27                | 57.0             |  |  |  |
| ML119A-129      | 189349                  | 73                      | 0.10589                              | 0.00167      | 2.67473                             | 0.18967              | 0.18319                             | 0.01267 | 0.975 | no                | 1730                                               | 29                | 1321                                             | 51                | 1084                                             | 69                | 40.5             |  |  |  |

### ML119A

#### Results from repeat analyses of standards

\*Values marked as outliers were excluded in the calculation of calibration values

| Analysis   | Outlier | <sup>207</sup> Pb/ <sup>206</sup> Pb | 1 se     | <sup>206</sup> Pb/ <sup>238</sup> U | 1 se     |
|------------|---------|--------------------------------------|----------|-------------------------------------|----------|
| LH9415-001 | *       | 0.119527                             | 0.000247 | 0.312957                            | 0.005354 |
| LH9415-002 |         | 0.117392                             | 0.000218 | 0.320875                            | 0.003728 |
| LH9415-003 |         | 0.116956                             | 0.000201 | 0.329189                            | 0.002884 |
| LH9415-004 |         | 0.116301                             | 0.000114 | 0.320412                            | 0.003539 |
| LH9415-005 |         | 0.116330                             | 0.000198 | 0.325101                            | 0.004519 |
| LH9415-006 |         | 0.116551                             | 0.000134 | 0.316089                            | 0.003502 |
| LH9415-007 |         | 0.116519                             | 0.000137 | 0.323671                            | 0.004758 |
| LH9415-009 |         | 0.117707                             | 0.000416 | 0.325428                            | 0.002786 |
| LH9415-010 |         | 0.115944                             | 0.000207 | 0.317952                            | 0.004055 |
| LH9415-011 |         | 0.117709                             | 0.000277 | 0.311492                            | 0.005391 |
| LH9415-012 |         | 0.116509                             | 0.000139 | 0.308814                            | 0.003712 |
| LH9415-013 |         | 0.117233                             | 0.000117 | 0.311985                            | 0.003005 |
| LH9415-014 |         | 0.116356                             | 0.000148 | 0.325189                            | 0.006040 |
| LH9415-015 |         | 0.116643                             | 0.000153 | 0.302844                            | 0.004874 |
| LH9415-017 |         | 0.116591                             | 0.000147 | 0.304622                            | 0.003976 |
| LH9415-018 |         | 0.116643                             | 0.000192 | 0.325236                            | 0.003208 |
| LH9415-019 |         | 0.116475                             | 0.000164 | 0.317444                            | 0.002512 |
| LH9415-020 |         | 0.117366                             | 0.000217 | 0.319427                            | 0.003337 |
| LH9415-021 |         | 0.116566                             | 0.000225 | 0.325499                            | 0.004048 |
| LH9415-022 |         | 0.117798                             | 0.000510 | 0.319502                            | 0.002853 |
| LH9415-023 |         | 0.116854                             | 0.000202 | 0.308371                            | 0.005357 |
| LH9415-024 |         | 0.117376                             | 0.000348 | 0.308503                            | 0.003411 |
| LH9415-025 |         | 0.116426                             | 0.000161 | 0.314958                            | 0.003573 |
| LH9415-026 |         | 0.116842                             | 0.000224 | 0.315629                            | 0.003352 |
| LH9415-027 |         | 0.116165                             | 0.000094 | 0.315553                            | 0.004067 |
| LH9415-028 |         | 0.117059                             | 0.000192 | 0.329388                            | 0.002360 |
| LH9415-029 |         | 0.116444                             | 0.000214 | 0.341328                            | 0.003121 |
| LH9415-030 |         | 0.117357                             | 0.000356 | 0.331587                            | 0.004203 |
| LH9415-031 |         | 0.116670                             | 0.000158 | 0.317765                            | 0.003223 |
| LH9415-032 |         | 0.117083                             | 0.000220 | 0.305310                            | 0.003491 |
| LH9415-033 |         | 0.116605                             | 0.000205 | 0.313246                            | 0.003305 |
| GJ132-001  | *       | 0.062917                             | 0.000188 | 0.097247                            | 0.000722 |
| GJ132-002  |         | 0.062839                             | 0.000148 | 0.096663                            | 0.001502 |
| GJ132-007  |         | 0.062059                             | 0.000230 | 0.094830                            | 0.000674 |
| GJ132-010  |         | 0.061979                             | 0.000181 | 0.095348                            | 0.001037 |
| GJ132-012  |         | 0.063301                             | 0.000288 | 0.091621                            | 0.001137 |
| GJ132-014  |         | 0.062619                             | 0.000163 | 0.093081                            | 0.000650 |
| GJ132-017  |         | 0.063008                             | 0.000332 | 0.094314                            | 0.001172 |
| GJ132-019  |         | 0.062302                             | 0.000198 | 0.095369                            | 0.001098 |
| GJ132-021  |         | 0.062618                             | 0.000171 | 0.094149                            | 0.001111 |
| GJ132-023  |         | 0.062365                             | 0.000191 | 0.092770                            | 0.001292 |
| GJ132-025  |         | 0.062806                             | 0.000182 | 0.092602                            | 0.000811 |
| GJ132-027  |         | 0.062179                             | 0.000189 | 0.093759                            | 0.001115 |
| GJ132-029  |         | 0.062075                             | 0.000271 | 0.097287                            | 0.001074 |









| Analysis   | Outlier | 207Pb/206Pb | 1 se     | 206Pb/238U | 1 se     |
|------------|---------|-------------|----------|------------|----------|
| LH9415-001 | *       | 0.114311    | 0.000151 | 0.335725   | 0.002220 |
| LH9415-002 | *       | 0.113969    | 0.000123 | 0.338236   | 0.002585 |
| LH9415-003 |         | 0.113736    | 0.000129 | 0.334608   | 0.002288 |
| LH9415-004 |         | 0.113550    | 0.000093 | 0.335948   | 0.002893 |
| LH9415-005 |         | 0.113462    | 0.000087 | 0.333471   | 0.002487 |
| LH9415-006 |         | 0.113391    | 0.000107 | 0.331341   | 0.002103 |
| LH9415-007 |         | 0.113774    | 0.000144 | 0.331622   | 0.002664 |
| LH9415-008 |         | 0.113063    | 0.000067 | 0.344787   | 0.002475 |
| LH9415-010 |         | 0.113795    | 0.000181 | 0.320421   | 0.003344 |
| LH9415-011 |         | 0.113888    | 0.000122 | 0.323320   | 0.002779 |
| LH9415-020 |         | 0.113925    | 0.000121 | 0.340858   | 0.003794 |
| LH9415-021 |         | 0.113164    | 0.000130 | 0.326895   | 0.001727 |
| LH9415-022 |         | 0.114813    | 0.000127 | 0.311332   | 0.002260 |
| LH9415-023 |         | 0.113825    | 0.000087 | 0.316163   | 0.001876 |
| LH9415-024 |         | 0.113276    | 0.000124 | 0.321698   | 0.003555 |
| LH9415-025 |         | 0.113626    | 0.000130 | 0.296519   | 0.002233 |
| LH9415-030 |         | 0.113104    | 0.000106 | 0.312821   | 0.000918 |
| LH9415-031 |         | 0.112673    | 0.000101 | 0.316254   | 0.001129 |
| LH9415-032 |         | 0.112647    | 0.000099 | 0.323847   | 0.002862 |
| LH9415-033 |         | 0.113094    | 0.000142 | 0.312215   | 0.001501 |
| LH9415-034 |         | 0.112961    | 0.000078 | 0.312891   | 0.003176 |
| LH9415-035 |         | 0.112870    | 0.000138 | 0.310211   | 0.001521 |
| LH9415-036 |         | 0.112863    | 0.000109 | 0.309111   | 0.002676 |
| LH9415-037 |         | 0.112620    | 0.000098 | 0.310950   | 0.002883 |
| LH9415-060 |         | 0.113005    | 0.000113 | 0.305445   | 0.001830 |
| LH9415-062 |         | 0.113151    | 0.000118 | 0.313613   | 0.002836 |
| LH9415-076 |         | 0.112905    | 0.000119 | 0.307901   | 0.002400 |
| LH9415-077 |         | 0.112733    | 0.000078 | 0.306270   | 0.003383 |
| LH9415-091 |         | 0.113251    | 0.000127 | 0.304819   | 0.002395 |
| LH9415-092 |         | 0.112734    | 0.000092 | 0.306527   | 0.002083 |
| LH9415-106 |         | 0.112695    | 0.000113 | 0.305733   | 0.002168 |
| LH9415-107 |         | 0.112496    | 0.000104 | 0.305576   | 0.002991 |
| LH9415-121 |         | 0.113040    | 0.000111 | 0.308056   | 0.003968 |
| LH9415-122 |         | 0.112791    | 0.000116 | 0.306791   | 0.002270 |
| LH9415-136 |         | 0.112995    | 0.000124 | 0.303849   | 0.002122 |
| LH9415-137 |         | 0.112857    | 0.000095 | 0.301720   | 0.002257 |
| LH9415-151 |         | 0.113207    | 0.000102 | 0.296976   | 0.003004 |
| LH9415-152 |         | 0.112964    | 0.000127 | 0.301615   | 0.002666 |
| GJ1-001    | *       | 0.061471    | 0.000107 | 0.096206   | 0.000839 |
| GJ1-002    |         | 0.061167    | 0.000114 | 0.094016   | 0.000600 |
| GJ1-003    |         | 0.061274    | 0.000188 | 0.093140   | 0.001394 |
| GJ1-004    |         | 0.061445    | 0.000167 | 0.093562   | 0.000943 |
| GJ132-10   |         | 0.061240    | 0.000143 | 0.093656   | 0.000765 |
| GJ132-020  |         | 0.061299    | 0.000108 | 0.091183   | 0.000469 |
| GJ1-021    |         | 0.061534    | 0.000185 | 0.091656   | 0.001420 |
| GJ1-022    | *       | 0.061392    | 0.000153 | 0.097103   | 0.000850 |
| GJ132-030  | *       | 0.063007    | 0.000193 | 0.091365   | 0.000723 |
| GJ132-031  |         | 0.061376    | 0.000129 | 0.090891   | 0.000748 |
| GJ132-033  |         | 0.061349    | 0.000118 | 0.090921   | 0.000795 |
| GJ132-034  |         | 0.060610    | 0.000128 | 0.093392   | 0.000739 |
| GJ1-036    |         | 0.060644    | 0.000107 | 0.092586   | 0.000728 |
| GJ1-037    |         | 0.060890    | 0.000142 | 0.090796   | 0.000584 |
| GJ132-063  |         | 0.061035    | 0.000114 | 0.091364   | 0.000848 |
| GJ132-064  |         | 0.060886    | 0.000097 | 0.090137   | 0.000676 |
| GJ132-078  |         | 0.060951    | 0.000135 | 0.090546   | 0.000897 |
| GJ132-079  |         | 0.060870    | 0.000104 | 0.090726   | 0.000620 |
| GJ132-093  |         | 0.061152    | 0.000131 | 0.090491   | 0.000639 |
| GJ132-094  |         | 0.061107    | 0.000098 | 0.090781   | 0.000793 |
| GJ132-108  |         | 0.061040    | 0.000122 | 0.090075   | 0.000835 |
| GJ132-109  |         | 0.060782    | 0.000090 | 0.090580   | 0.000797 |
| GJ132-123  |         | 0.060805    | 0.000146 | 0.090508   | 0.000585 |
| GJ132-124  |         | 0.060948    | 0.000089 | 0.089744   | 0.000863 |
| GJ132-138  |         | 0.060961    | 0.000160 | 0.090986   | 0.000628 |
| GJ132-139  |         | 0.060974    | 0.000092 | 0.090225   | 0.000688 |

GJ132-153  
GJ132-154

0.060964 0.000086  
0.061143 0.000129

0.090388 0.000708  
0.087936 0.000612





|            |        |     |          |          |          |          |         |         |       |     |                       |    |      |    |      |    |        |
|------------|--------|-----|----------|----------|----------|----------|---------|---------|-------|-----|-----------------------|----|------|----|------|----|--------|
| ML12A-119  | 56035  | 53  | 0.05960  | 0.00119  | 0.70121  | 0.02846  | 0.08534 | 0.00301 | 0.870 | no  | 589                   | 43 | 540  | 17 | 528  | 18 | 10.8   |
| ML123A-122 | 438065 | 395 | 0.11197  | 0.00510  | 1.82129  | 0.15880  | 0.11797 | 0.00877 | 0.853 | yes | 1832                  | 80 | 1053 | 56 | 719  | 50 | 64.1   |
| ML123A-123 | 20300  | 35  | 0.05599  | 0.00135  | 0.70095  | 0.02985  | 0.09080 | 0.00318 | 0.823 | no  | 452                   | 53 | 539  | 18 | 560  | 19 | -25.0  |
| ML123A-124 | 32989  | 42  | 0.05669  | 0.00133  | 0.68559  | 0.03196  | 0.08771 | 0.00353 | 0.864 | no  | 479                   | 51 | 530  | 19 | 542  | 21 | -13.6  |
| ML123A-125 | 9580   | 39  | 0.05095  | 0.00156  | 0.74784  | 0.03971  | 0.10645 | 0.00462 | 0.818 | no  | 239                   | 69 | 567  | 23 | 652  | 27 | -182.2 |
| ML123A-126 | 28430  | 56  | 0.08892  | 0.00164  | 2.49905  | 0.23347  | 0.20383 | 0.01867 | 0.980 | no  | 1402                  | 35 | 1272 | 66 | 1196 | 99 | 16.1   |
| ML123A-127 | 99316  | 140 | 0.07382  | 0.00144  | 0.91391  | 0.07482  | 0.08979 | 0.00714 | 0.971 | no  | 1037                  | 39 | 659  | 39 | 554  | 42 | 48.5   |
| ML123A-129 | 13911  | 72  | 0.05728  | 0.00170  | 0.85654  | 0.04389  | 0.10845 | 0.00453 | 0.816 | no  | 502                   | 64 | 628  | 24 | 664  | 26 | -33.8  |
| ML123A-130 | 54824  | 86  | 0.07185  | 0.00098  | 1.37311  | 0.07836  | 0.13861 | 0.00768 | 0.971 | no  | 982                   | 28 | 877  | 33 | 837  | 43 | 15.7   |
| ML123A-104 | 926    | 51  | -0.00941 | -0.01670 | -0.14457 | -0.25680 | 0.11146 | 0.00670 | 0.034 | no  | Discarded: not zircon |    |      |    |      |    |        |

## Results from repeat analyses of standards

\*Values marked as outliers were excluded in the calculation of calibration values

| Analysis  | Outlier | 207Pb/206Pb | 1 se     | 206Pb/238U | 1 se     |
|-----------|---------|-------------|----------|------------|----------|
| LH9415-01 | *       | 0.117452    | 0.000162 | 0.291343   | 0.004403 |
| LH9415-02 | *       | 0.116856    | 0.000214 | 0.289020   | 0.005901 |
| LH9415-03 | *       | 0.116646    | 0.000280 | 0.292429   | 0.003588 |
| LH9415-04 |         | 0.116580    | 0.000256 | 0.292605   | 0.005331 |
| LH9415-05 |         | 0.118094    | 0.000234 | 0.284753   | 0.005880 |
| LH9415-06 |         | 0.117645    | 0.000207 | 0.287278   | 0.004297 |
| LH9415-07 |         | 0.118003    | 0.000186 | 0.287163   | 0.005048 |
| LH9415-08 |         | 0.118008    | 0.000252 | 0.280932   | 0.004474 |
| LH9415-09 |         | 0.118174    | 0.000209 | 0.289868   | 0.005009 |
| LH9415-11 |         | 0.118132    | 0.000203 | 0.283123   | 0.005322 |
| LH9415-12 | *       | 0.117930    | 0.000245 | 0.270706   | 0.011364 |
| LH9415-13 |         | 0.118354    | 0.000216 | 0.288185   | 0.007004 |
| LH9415-14 |         | 0.118042    | 0.000297 | 0.290793   | 0.004414 |
| LH9415-15 |         | 0.118548    | 0.000208 | 0.279940   | 0.003171 |
| LH9415-16 |         | 0.117864    | 0.000193 | 0.287917   | 0.003867 |
| LH9415-17 |         | 0.118100    | 0.000294 | 0.274625   | 0.005139 |
| LH9415-18 |         | 0.118184    | 0.000187 | 0.298226   | 0.004045 |
| LH9415-19 |         | 0.117974    | 0.000247 | 0.295409   | 0.002802 |
| LH9415-20 |         | 0.117823    | 0.000181 | 0.297610   | 0.003207 |
| LH9415-21 |         | 0.118804    | 0.000213 | 0.301109   | 0.003823 |
| LH9415-22 |         | 0.118560    | 0.000128 | 0.294408   | 0.004556 |
| LH9415-23 |         | 0.118247    | 0.000193 | 0.318482   | 0.003128 |
| LH9415-24 |         | 0.118018    | 0.000099 | 0.313192   | 0.003173 |
| LH9415-25 |         | 0.117702    | 0.000260 | 0.308161   | 0.003770 |
| LH9415-26 | *       | 0.117732    | 0.000165 | 0.336024   | 0.005369 |
| LH9415-27 |         | 0.118096    | 0.000209 | 0.315148   | 0.003301 |
| LH9415-28 |         | 0.117596    | 0.000254 | 0.317496   | 0.003357 |
| LH9415-29 |         | 0.117955    | 0.000206 | 0.314112   | 0.003199 |
| LH9415-30 |         | 0.117796    | 0.000194 | 0.314142   | 0.003426 |
| LH9415-31 |         | 0.117117    | 0.000198 | 0.309962   | 0.003490 |
| LH9415-32 |         | 0.117292    | 0.000177 | 0.305322   | 0.005889 |
| LH9415-33 |         | 0.117328    | 0.000148 | 0.295344   | 0.003205 |
| LH9415-34 |         | 0.116841    | 0.000166 | 0.307858   | 0.006898 |
| GJ1-1     | *       | 0.062381    | 0.000212 | 0.083040   | 0.001910 |
| GJ1-2     |         | 0.062058    | 0.000297 | 0.087503   | 0.001110 |
| GJ1-3     |         | 0.061822    | 0.000409 | 0.088941   | 0.001821 |
| GJ1-4     |         | 0.061685    | 0.000326 | 0.087282   | 0.001882 |
| GJ132-05  |         | 0.061929    | 0.000335 | 0.086572   | 0.001890 |
| GJ132-06  |         | 0.061910    | 0.000179 | 0.088077   | 0.001897 |
| GJ132-07  |         | 0.062263    | 0.000273 | 0.086868   | 0.000983 |
| GJ132-08  |         | 0.062494    | 0.000264 | 0.085737   | 0.002387 |
| GJ132-09  |         | 0.062566    | 0.000213 | 0.085788   | 0.000915 |
| GJ132-10  |         | 0.062521    | 0.000264 | 0.087713   | 0.001406 |
| GJ132-11  |         | 0.062804    | 0.000256 | 0.089919   | 0.001965 |
| GJ132-12  |         | 0.061780    | 0.000292 | 0.088479   | 0.001558 |
| GJ132-13  |         | 0.062188    | 0.000392 | 0.087602   | 0.000888 |
| GJ132-14  |         | 0.062281    | 0.000477 | 0.085425   | 0.000929 |
| GJ132-15  |         | 0.062091    | 0.000269 | 0.088389   | 0.001831 |



|          |          |          |          |          |
|----------|----------|----------|----------|----------|
| GJ132-16 | 0.062270 | 0.000262 | 0.088147 | 0.001176 |
| GJ132-17 | 0.062382 | 0.000226 | 0.087892 | 0.001128 |
| GJ132-18 | 0.061882 | 0.000299 | 0.086133 | 0.000937 |
| GJ132-19 | 0.062088 | 0.000239 | 0.086242 | 0.001126 |
| GJ132-20 | 0.062252 | 0.000224 | 0.089389 | 0.000887 |
| GJ132-21 | 0.063246 | 0.000187 | 0.088850 | 0.001447 |
| GJ132-22 | 0.062908 | 0.000160 | 0.088252 | 0.001294 |
| GJ132-23 | 0.063171 | 0.000166 | 0.087638 | 0.000945 |
| GJ132-24 | 0.062550 | 0.000126 | 0.088943 | 0.000568 |
| GJ132-25 | 0.062293 | 0.000273 | 0.088554 | 0.000883 |
| GJ132-26 | 0.061725 | 0.000317 | 0.089661 | 0.001082 |
| GJ132-27 | 0.062924 | 0.000325 | 0.088580 | 0.000677 |
| GJ132-28 | 0.061485 | 0.000359 | 0.090757 | 0.000868 |
| GJ132-29 | 0.062491 | 0.000303 | 0.088152 | 0.000684 |
| GJ132-30 | 0.062431 | 0.000248 | 0.089262 | 0.000677 |
| GJ132-31 | 0.062808 | 0.000351 | 0.090243 | 0.000910 |
| GJ132-32 | 0.062185 | 0.000433 | 0.090000 | 0.001183 |
| GJ132-33 | 0.062355 | 0.000471 | 0.089056 | 0.001309 |
| GJ132-34 | 0.063286 | 0.000478 | 0.088310 | 0.001686 |





|           |   |          |          |          |          |
|-----------|---|----------|----------|----------|----------|
| LH9415-21 |   | 0.116281 | 0.000238 | 0.292639 | 0.003411 |
| LH9415-22 |   | 0.116706 | 0.000211 | 0.298589 | 0.003121 |
| LH9415-23 |   | 0.116112 | 0.000154 | 0.299820 | 0.003296 |
| LH9415-24 |   | 0.116575 | 0.000175 | 0.295557 | 0.003162 |
| LH9415-25 |   | 0.115859 | 0.000154 | 0.299277 | 0.003273 |
| LH9415-26 |   | 0.117498 | 0.000219 | 0.305767 | 0.002500 |
| LH9415-27 |   | 0.116422 | 0.000182 | 0.303207 | 0.002077 |
| LH9415-28 |   | 0.116644 | 0.000194 | 0.295848 | 0.003720 |
| LH9415-29 |   | 0.116093 | 0.000189 | 0.299741 | 0.003399 |
| LH9415-30 |   | 0.116411 | 0.000169 | 0.294057 | 0.003357 |
| LH9415-31 |   | 0.116321 | 0.000155 | 0.297632 | 0.003191 |
| LH9415-32 |   | 0.117006 | 0.000214 | 0.297226 | 0.002696 |
| LH9415-33 |   | 0.116379 | 0.000143 | 0.297285 | 0.003177 |
| LH9415-34 |   | 0.117957 | 0.000221 | 0.295204 | 0.003502 |
| LH9415-35 |   | 0.116532 | 0.000118 | 0.301129 | 0.005494 |
|           |   |          |          |          |          |
| GJ1-01    | * | 0.061853 | 0.000191 | 0.093579 | 0.001186 |
| GJ1-02    | * | 0.061987 | 0.000136 | 0.096345 | 0.000907 |
| GJ132-07  |   | 0.061655 | 0.000204 | 0.091775 | 0.001188 |
| GJ132-09  |   | 0.061917 | 0.000172 | 0.087567 | 0.000853 |
| GJ132-11  |   | 0.062000 | 0.000191 | 0.088366 | 0.001252 |
| GJ132-013 |   | 0.061961 | 0.000222 | 0.087469 | 0.000799 |
| GJ132-15  |   | 0.062009 | 0.000146 | 0.087983 | 0.001444 |
| GJ1-17    |   | 0.063128 | 0.000240 | 0.090174 | 0.002127 |
| GJ132-19  |   | 0.062325 | 0.000193 | 0.089198 | 0.000613 |
| GJ132-21  |   | 0.062979 | 0.000240 | 0.089716 | 0.000733 |
| GJ132-23  | * | 0.065355 | 0.000340 | 0.089796 | 0.000966 |
| GJ132-25  | * | 0.061449 | 0.000355 | 0.135890 | 0.005633 |
| GJ132-27  |   | 0.062549 | 0.000173 | 0.086980 | 0.000844 |
| GJ132-29  |   | 0.063524 | 0.000417 | 0.089430 | 0.001054 |
| GJ132-31  |   | 0.062331 | 0.000156 | 0.086195 | 0.000987 |
| GJ132-33  |   | 0.062863 | 0.000202 | 0.088667 | 0.001410 |
| GJ132-35  |   | 0.061984 | 0.000479 | 0.085191 | 0.001765 |
